# Supplementary material for: Generation of a knock-in MAP2-tdTomato reporter human embryonic stem cell line with inducible expression of NEUROG2/1 (NYGCe001-A)
Source: PubMed Central journal article supplement — Stem Cell Res. Author manuscript; Available in PMC 2019 Dec 18. (PMC6919562; doi:10.1016/j.scr.2019.101643), 2019-11-01
Supplement: NIHMS1546167-supplement-2.pdf [file NIHMS1546167-supplement-2.pdf]

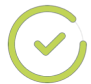

## DNA Analysis

**Cell Line Match ID:** HUES66

**Sex:** Female

**Likely Genetic Origin:**

*Northern European (70.5%)*

*African (11%)*

*South American (8.6%)*

*Other (10%)*

**Contamination Detected:** None

## Strain Information

**Cell type:** Human pluripotent stem cell

**Parental strain:** HUES66-2

**Clones available:** 3 out of 3

**Introduced modifications:** 2

## Novel Cell Line Modifications

**Gene Editing:** Yes

*Method: CRISPR/Cas9*

*KO/KI : KI*

*Insert: MAP2-tdTomato knock-in [MTKI]*

*Monoclonal line: Yes*

*Passages since edit: +6*

**Drug Treatments:** No

*Compound name: NA*

*Passages since application: NA*

*Passages since application: NA*

**Freeze/Thaw:** No

*Passages since thaw: NA*

## Copy Number Analysis

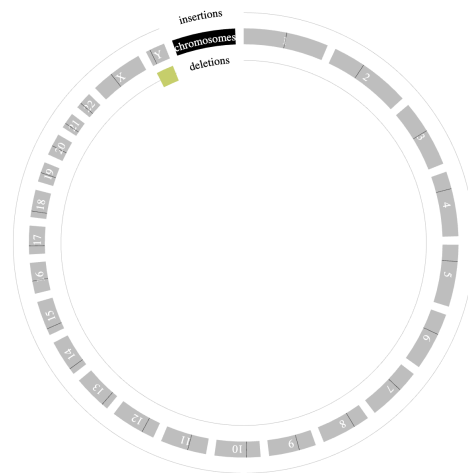

CNVs Detected.....0

Insertions.....0

*Median Length: NA*

Deletions.....0

*Median Length: NA*

## Read Statistics

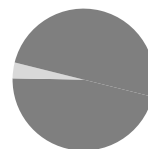

Mapped ■  
Not mapped □

Number of reads.....75397

Median read length.....4065

Reads until ID.....200

## Data Capabilities

**Match reference document:**

NYGC00001-HUES66-1A

**Max CNV Resolution:** del:20MB, ins:10Mb

**Contamination Detection Threshold:** >60%

**Match Resolution:** Within immediate family
