# Supplementary figures and images for: Generation of a knock-in MAP2-tdTomato reporter human embryonic stem cell line with inducible expression of NEUROG2/1 (NYGCe001-A)
Source: PubMed Central journal article supplement — Stem Cell Res. Author manuscript; Available in PMC 2019 Dec 18. (PMC6919562; doi:10.1016/j.scr.2019.101643), 2019-11-01

**A**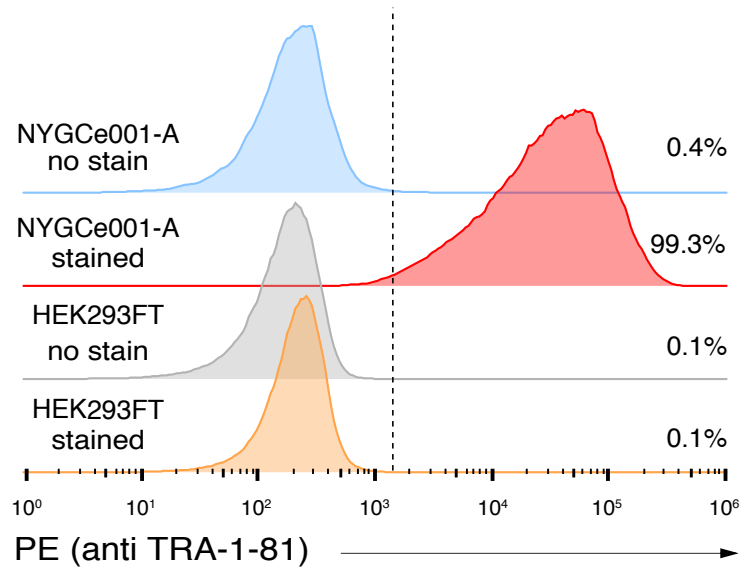**B**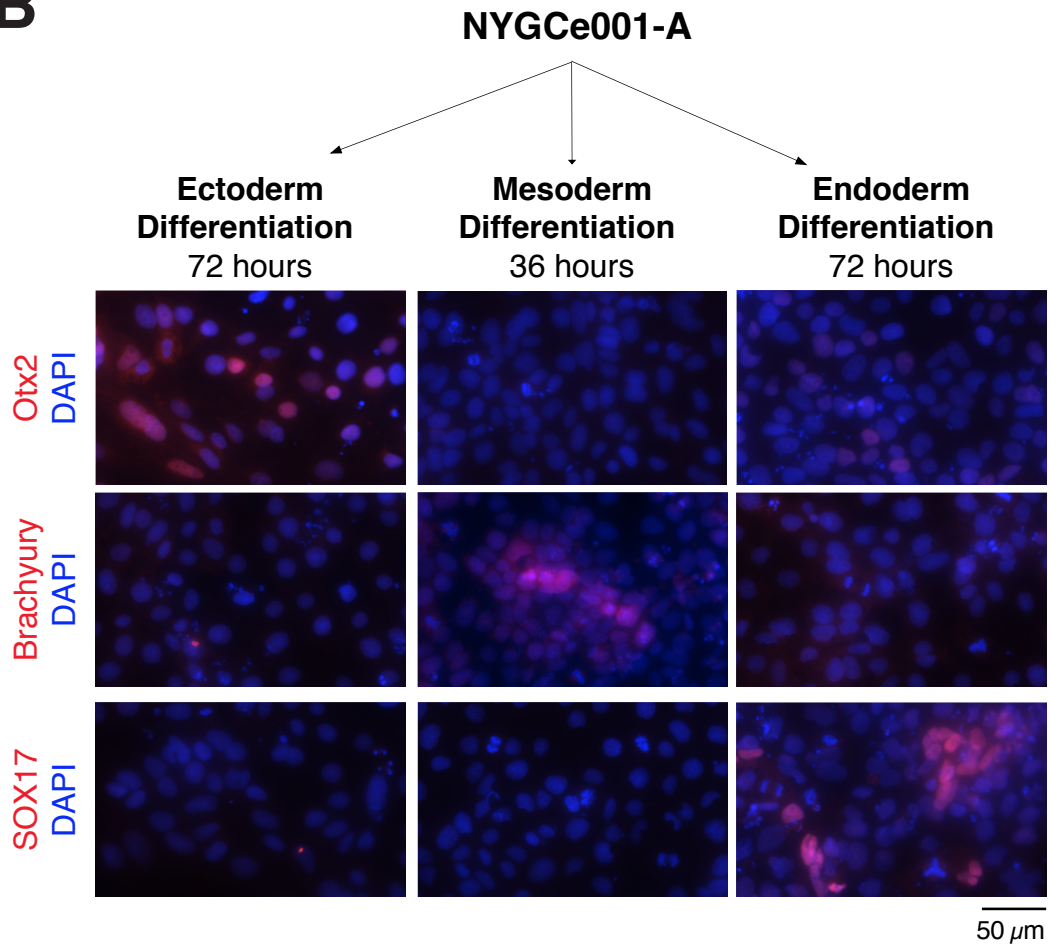

Supplement: NIHMS1546167-supplement-1.pdf [file NIHMS1546167-supplement-1.pdf]

# MycoAlert PLUS mycoplasma detection

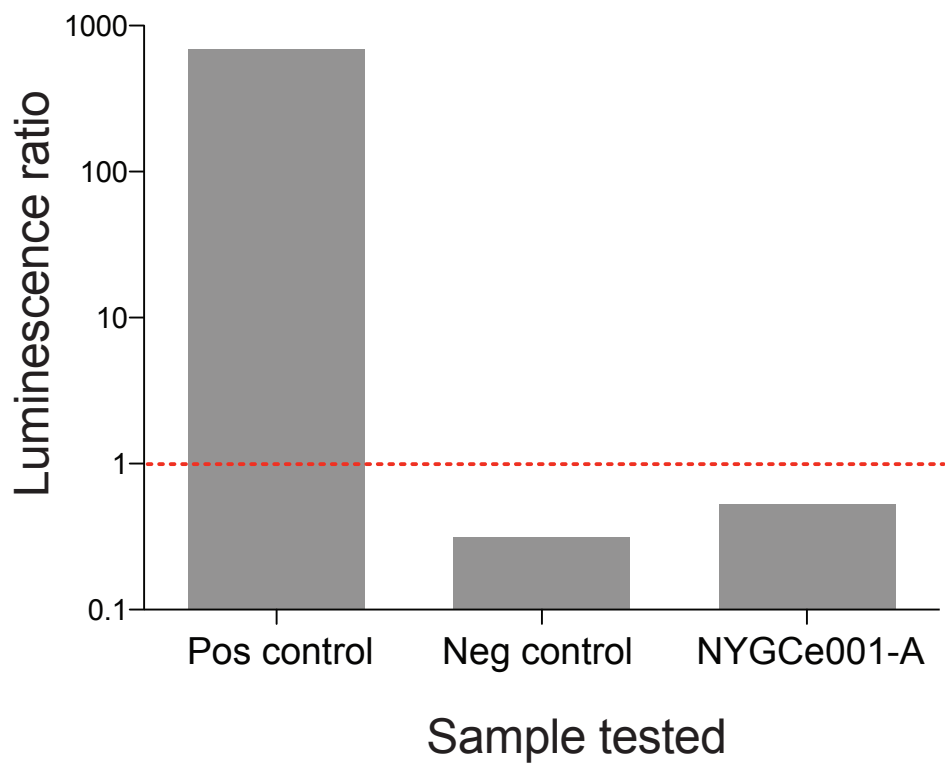

Supplement: NIHMS1546167-supplement-3.pdf [file NIHMS1546167-supplement-3.pdf]
